# Supplementary material
Source: PubMed Central journal article supplement (PMC9768679)

Low et al. *Supplementary figure 1*

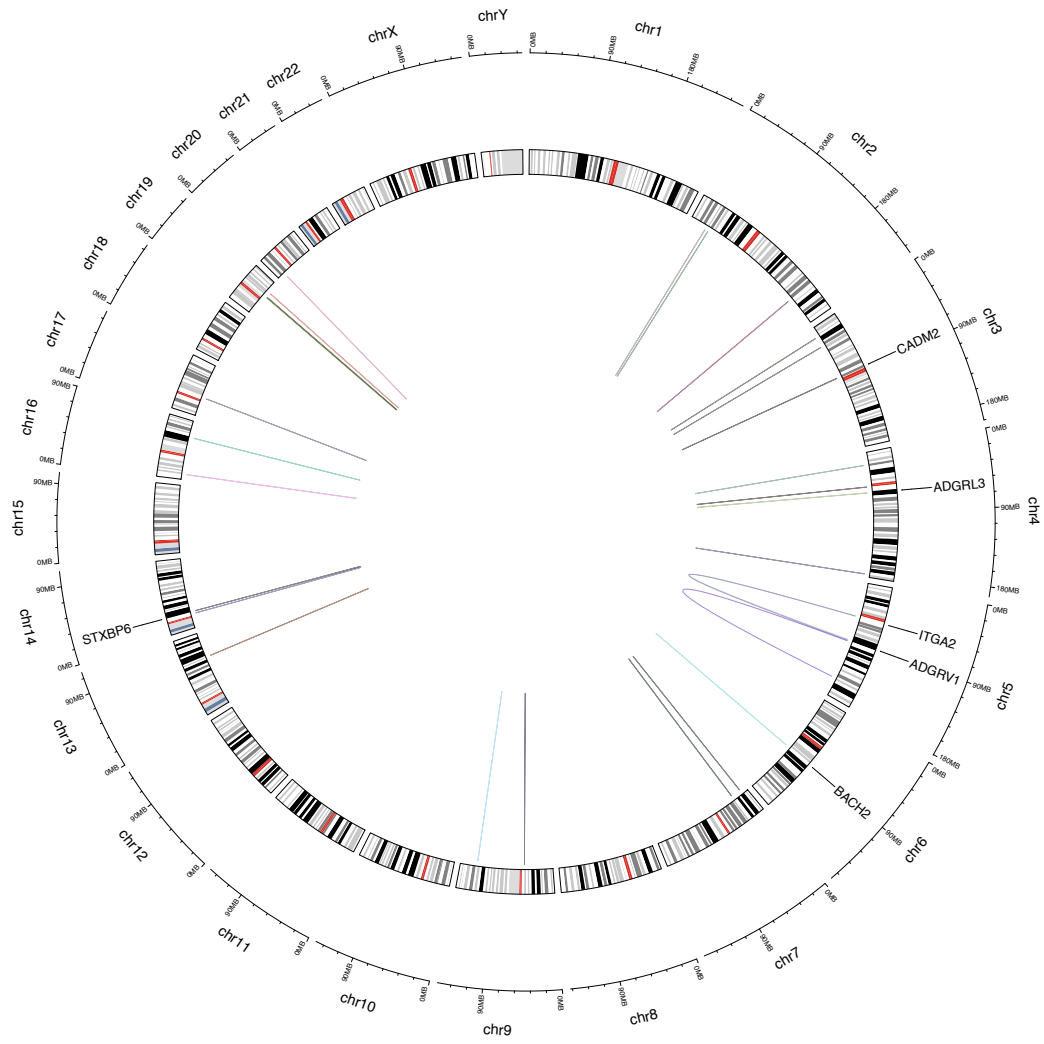

Supplement: mmc1.pdf [file mmc1.pdf]

Low et al. *Supplementary figure 2*

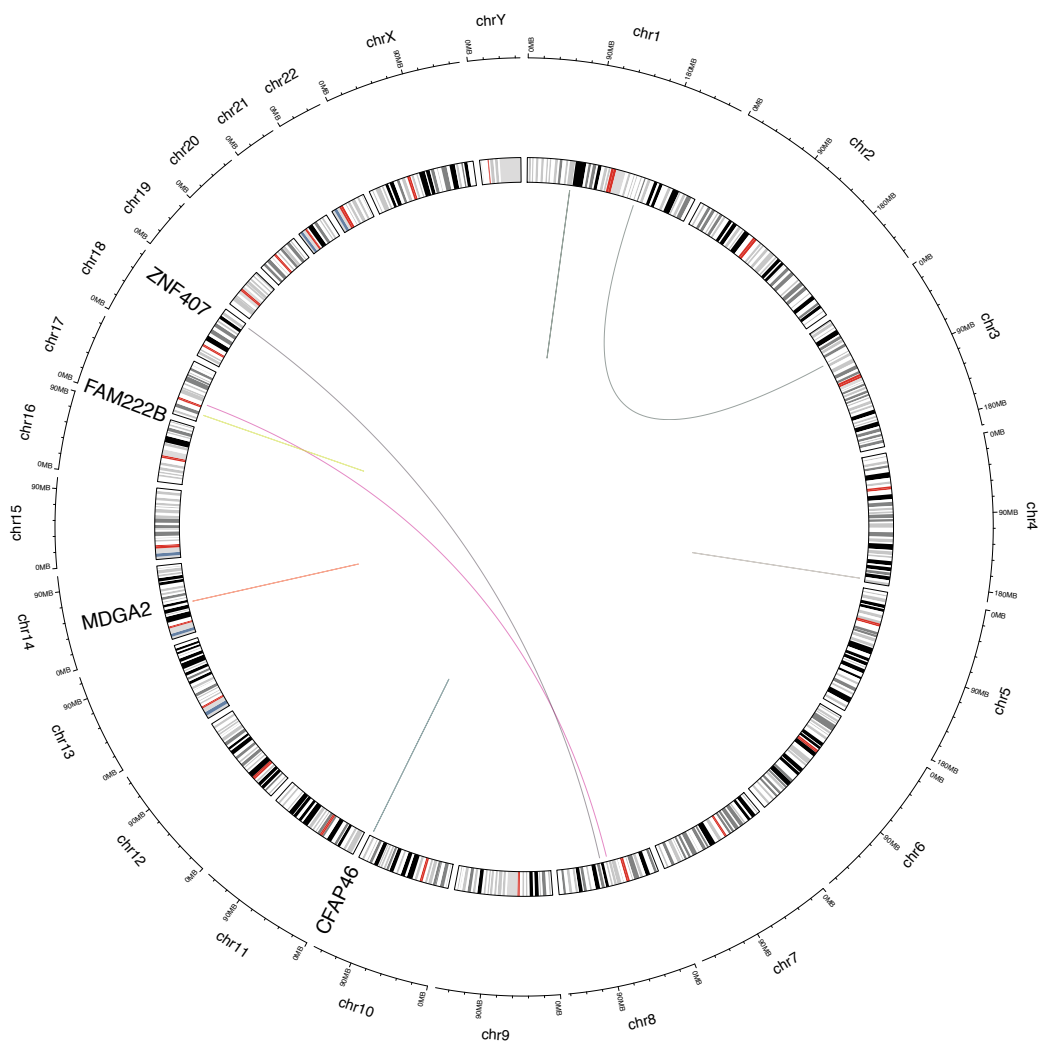

Supplement: mmc2.pdf [file mmc2.pdf]

# Low et al. *Supplementary figure 3*

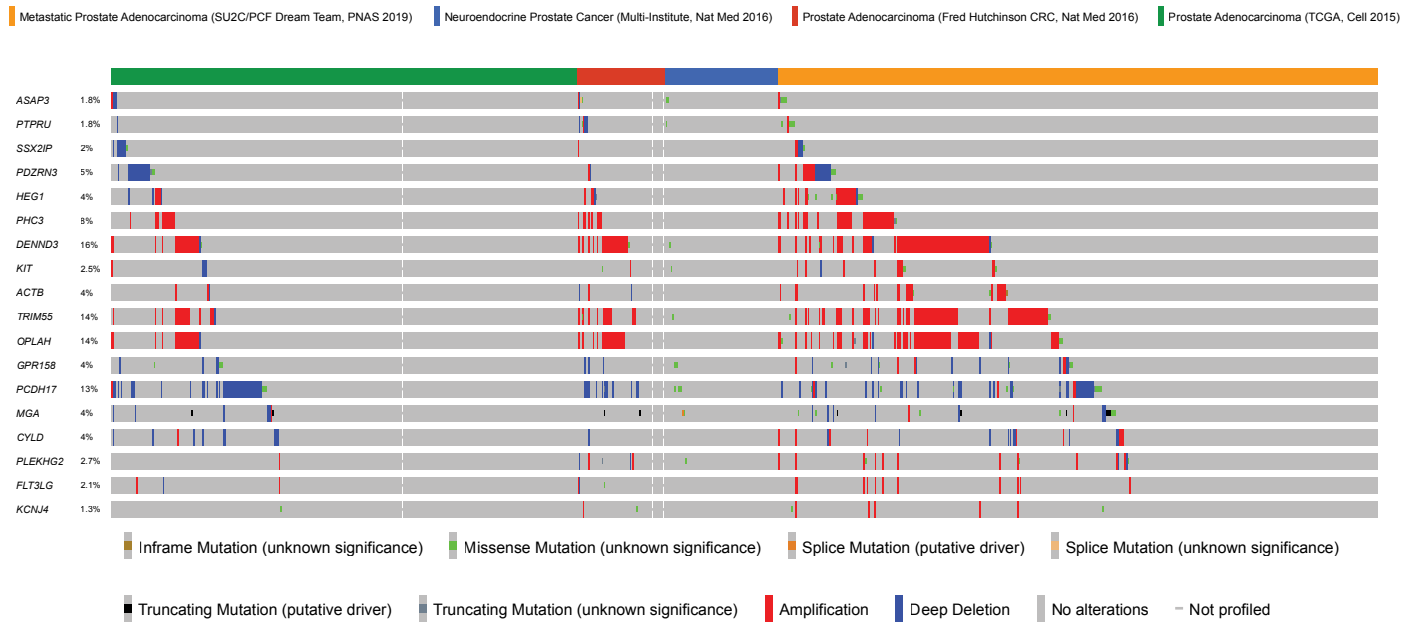

Supplement: mmc3.pdf [file mmc3.pdf]
